# Supplementary material
Source: PubMed Central journal article supplement (PMC1305047)
Supplement: biophysj_104.050062_2.pdf [file biophysj_104.050062_2.pdf]

## Supplementary material

Supplementary\_Image\_Processing\_and\_Simulation.pdf provides detailed, step-by-step instructions for reproduction of the used image processing procedures. The source (Mathematica notebook) of the shown simulation is also provided.

Raw and step-by-step processed image series are shown for Fig.1A-B, 5C and 6A in QuickTime format (movie1-3).

### *Supplementary movie 1*

ATP-evoked (100  $\mu\text{M}$  at  $t \approx 30\text{s}$ )  $\text{Ca}^{2+}$  rise in the cytosol and mitochondria (depicts Fig. 1A-B). Wide-field fluorescence image series of X-rhod-1 loaded intact rat brain capillary endothelial cell in culture. RAW: raw image sequence of X-rhod-1 loaded endothelial cell stimulated with ATP is shown on the top. Images sequences below were consecutively processed as indicated (for cytosolic and mitochondrial  $[\text{Ca}^{2+}]$  separately, shown on the left and the right, respectively). LF: lowpass spatial filtering; HF: highpass spatial filtering; ABS: absolute value calculation; SG: spatial Savitzky-Golay kernel smoothing; DE: dilation-erosion smoothing;  $\delta f$ :  $DF/F_0$  normalization; dt: temporal differentiation. OVERLAY: highpass filtered fluorescence differentiated in time shown as  $\delta f/t$ , in pseudocolor (same as dt on the right), overlaid by the cytosolic  $\text{Ca}^{2+}$  wavefront shown in grayscale (same as dt on the left). The pseudocolor coded image was masked (gated or intensity modulated displayed - IMD) by the HF image. ZOOM: 300% zoom on the OVERLAY image. Playback: slowed down (exposure: 60ms, playback: 10 fps).

### ***Supplementary movie 2***

TMRM irradiation induced mitochondrial membrane potential depolarizations at quenching condition (depicts Fig. 5C). Wide-field fluorescence image series of TMRM loaded intact rat brain capillary endothelial cell in culture. Left: raw image series. Right: after differentiation in time ( $df/dt$ ) in pseudocolor. Red color shows sudden rises (or flickering) of fluorescence. Playback: real time (12.5 fps).

### ***Supplementary movie 3***

TMRM irradiation induced mitochondrial membrane potential depolarizations at non-quenching condition (depicts Fig. 6A). Wide-field fluorescence image series of TMRM loaded intact rat brain capillary endothelial cell in culture. RAW: raw image sequence of an endothelial cell exposed to strong illumination is shown on the top. Images below were consecutively processed as indicated. HF: highpass spatial filtering (with absolute value calculation); DE+SG: dilation-erosion smoothing and spatial Savitzky-Golay kernel smoothing; dt: temporal differentiation. The dt image is shown in pseudocolor, gated with the HF (without absolute value calculation) image. CORR: The areas flickering temporally correlated are indicated in different colors. Playback: faster than original (exposure: 80ms, playback: 20 fps).
